# Supplementary material
Source: PubMed Central journal article supplement (PMC6446715)
Supplement: 10.1194_M089508_jlr.M089508-1.pdf [file 10.1194_M089508_jlr.M089508-1.pdf]

## Certificate of Analysis

### University of California, Davis

1 Shields Ave, Meyer Hall Rm 2218  
 Davis California 95616 United States

|                            |                       |                          |                              |
|----------------------------|-----------------------|--------------------------|------------------------------|
| <b>Sample Name:</b>        | Fish Oil              | <b>Covance Sample:</b>   | 6048826                      |
| <b>Project ID</b>          | UCDAVIS-20170412-0001 | <b>Receipt Date</b>      | 11-Apr-2017                  |
| <b>PO Number</b>           | CVD                   | <b>Receipt Condition</b> | Cold on Wet Ice or Ice Packs |
| <b>Lot Number</b>          | Jedwards 5210001      | <b>Login Date</b>        | 12-Apr-2017                  |
| <b>Sample Serving Size</b> | 100 mL                | <b>Online Order</b>      | 11527-D9E5676                |
| <b>Description</b>         | opened 10/12/16       |                          |                              |

**Analysis**
**Result**
**Fatty Acids Calculated as Triglycerides**

|                                               |                       |
|-----------------------------------------------|-----------------------|
| Saturated Fatty Acids (Acid Form)             | 22.1 g/Serving Size   |
| Total Cis Unsaturated Fatty Acids (Acid Form) | 53.4 g/Serving Size   |
| Monounsaturated Fatty Acids (Acid Form)       | 17.9 g/Serving Size   |
| Polyunsaturated Fatty Acids (Acid Form)       | 35.6 g/Serving Size   |
| Trans Fatty Acids (Acid Form)                 | 0.752 g/Serving Size  |
| Omega 3 Fatty Acids                           | 32.6 g/Serving Size   |
| Omega 6 Fatty Acids                           | 4.55 g/Serving Size   |
| Omega 9 Fatty Acids                           | 8.65 g/Serving Size   |
| Total Fatty Acids                             | 79.7 g/Serving Size   |
| 4:0 Butyric                                   | <0.065 g/Serving Size |
| 6:0 Caproic                                   | <0.065 g/Serving Size |
| 8:0 Caprylic                                  | <0.065 g/Serving Size |
| 10:0 Capric                                   | <0.065 g/Serving Size |
| 12:0 Lauric                                   | 0.0958 g/Serving Size |
| 14:0 Myristic                                 | 6.19 g/Serving Size   |
| 14:1 Myristoleic                              | <0.065 g/Serving Size |
| 15:0 Pentadecanoic                            | 0.467 g/Serving Size  |
| 15:1 Pentadecenoic                            | <0.065 g/Serving Size |
| 16:0 Palmitic                                 | 13.0 g/Serving Size   |
| 16:1 Palmitoleic                              | 7.17 g/Serving Size   |
| 17:0 Heptadecanoic                            | 0.388 g/Serving Size  |
| 17:1 Heptadecenoic                            | <0.065 g/Serving Size |
| 18:0 Stearic                                  | 2.72 g/Serving Size   |
| 9c 18:1 Oleic                                 | 7.40 g/Serving Size   |
| 18:2 Linoleic                                 | 2.69 g/Serving Size   |
| 18:3 Gamma Linolenic                          | 0.225 g/Serving Size  |
| 18:3 Linolenic                                | 0.555 g/Serving Size  |
| 18:4 Octadecatetraenoic                       | 2.25 g/Serving Size   |
| 20:0 Arachidic                                | 0.199 g/Serving Size  |
| 20:1 Eicosenoic                               | 0.765 g/Serving Size  |
| 20:2 Eicosadienoic                            | 0.146 g/Serving Size  |
| 20:3 Eicosatrienoic (n3)                      | <0.065 g/Serving Size |
| 20:3 Homogamma Linolenic (n6)                 | 0.136 g/Serving Size  |
| 20:4 Arachidonic (n3)                         | 0.620 g/Serving Size  |
| 20:4 Arachidonic (n6)                         | 0.918 g/Serving Size  |
| 20:5 Eicosapentaenoic                         | 14.7 g/Serving Size   |
| 21:5 Heneicosapentaenoic                      | 0.591 g/Serving Size  |

## Certificate of Analysis

### University of California, Davis

1 Shields Ave, Meyer Hall Rm 2218  
Davis California 95616 United States

|                            |                       |                          |                              |
|----------------------------|-----------------------|--------------------------|------------------------------|
| <b>Sample Name:</b>        | Fish Oil              | <b>Covance Sample:</b>   | 6048826                      |
| <b>Project ID</b>          | UCDAVIS-20170412-0001 | <b>Receipt Date</b>      | 11-Apr-2017                  |
| <b>PO Number</b>           | CVD                   | <b>Receipt Condition</b> | Cold on Wet Ice or Ice Packs |
| <b>Lot Number</b>          | Jedwards 5210001      | <b>Login Date</b>        | 12-Apr-2017                  |
| <b>Sample Serving Size</b> | 100 mL                | <b>Online Order</b>      | 11527-D9E5676                |
| <b>Description</b>         | opened 10/12/16       |                          |                              |

| Analysis                                       | Result                |
|------------------------------------------------|-----------------------|
| <b>Fatty Acids Calculated as Triglycerides</b> |                       |
| 22:0 Behenic                                   | 0.165 g/Serving Size  |
| 22:1 Erucic                                    | 0.124 g/Serving Size  |
| 22:2 Docosadienoic                             | <0.065 g/Serving Size |
| 22:3 Docosatrienoic                            | <0.065 g/Serving Size |
| 22:4 Docosatetraenoic                          | 0.0985 g/Serving Size |
| 22:5 Docosapentaenoic (n3)                     | 1.72 g/Serving Size   |
| 22:5 Docosapentaenoic (n6)                     | 0.335 g/Serving Size  |
| 22:6 Docosahexaenoic                           | 12.1 g/Serving Size   |
| 24:0 Lignoceric                                | <0.065 g/Serving Size |
| 24:1 Nervonic                                  | 0.356 g/Serving Size  |
| Total 18:1 trans                               | 0.242 g/Serving Size  |
| Total 18:1 cis                                 | 10.3 g/Serving Size   |
| Total 18:2 trans                               | 0.338 g/Serving Size  |
| Total 18:3 trans                               | 0.205 g/Serving Size  |
| <b>Specific Gravity</b>                        |                       |
| Density                                        | 0.931 g/mL            |
| <b>P-Anisidine Value</b>                       |                       |
| P-Anisidine Value                              | 12.0                  |
| <b>Peroxide Value</b>                          |                       |
| Peroxide Value                                 | 15.25 Meq/kg of fat   |

| Method References | Testing Location |
|-------------------|------------------|
|-------------------|------------------|

|                                                         |                                       |
|---------------------------------------------------------|---------------------------------------|
| <b>Fatty Acids Calculated as Triglycerides (FALT_S)</b> | <b>Covance Laboratories - Madison</b> |
|---------------------------------------------------------|---------------------------------------|

Official Method No. 996.06, Official Methods of Analysis of the AOAC INTERNATIONAL (modified), 19th Ed., AOAC INTERNATIONAL: Gaithersburg, Maryland (2012).

Official Methods and Recommended Practices of the AOCS, Official methods Ce 2b-11 (2011), Ce 1h-05 (2009), Ce 1j-07 (2013), Ce 2-66 (2009), The American Oil Chemists' Society, Champaign, IL (modified).

|                                   |                                       |
|-----------------------------------|---------------------------------------|
| <b>P-Anisidine Value (ANID_S)</b> | <b>Covance Laboratories - Madison</b> |
|-----------------------------------|---------------------------------------|

Official Methods and Practices of the American Oil Chemists' Society 5th Edition, AOCS Official Method Cd 18-90, American Oil Chemists' Society, Champaign, IL (1997)

United States Pharmacopeia, Thirty-second Revision, <401 Fats & Fixed Oils>, USP Convention, Inc., Rockville, MD (2010).

## Certificate of Analysis

University of California, Davis

1 Shields Ave, Meyer Hall Rm 2218  
Davis California 95616 United States

### Method References

### Testing Location

#### Peroxide Value (PVFF\_S)

Covance Laboratories - Madison

American Oil Chemists' Society, Cd 8-53 Peroxide Value Acetic Acid-Chloroform Method (modified), Official Methods and Recommended Practices of AOCS, Fifth Ed., American Oil Chemists' Society, Champaign, IL (2003).  
United States Pharmacopeia, 34th Rev., <401> Fats & Fixed Oils, USP Convention, Inc., p. 153, Rockville, MD (2011).  
Lipid extraction: Official Methods of Analysis of the AOAC International, 18th edition, Rev 4, Official Method 983.23. AOAC International, Gaithersburg, MD. 2005 (modified).

#### Specific Gravity (SPGP\_S)

Covance Laboratories - Madison

NIST Handbook 133 - Checking the Net Contents of Packaged Goods, 2015 Edition (Modified)

### Testing Location(s)

### Released on Behalf of Covance by

#### Covance Laboratories - Madison

Edward Ladwig - Director

Covance Laboratories Inc.  
3301 Kinsman Blvd  
Madison WI 53704  
800-675-8375

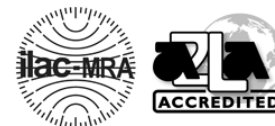

2918.01

These results apply only to the items tested. This certificate of analysis shall not be reproduced, except in its entirety, without the written approval of Covance.

## Certificate of Analysis

### University of California, Davis

1 Shields Ave, Meyer Hall Rm 2218  
 Davis California 95616 United States

|                            |                       |                          |                              |
|----------------------------|-----------------------|--------------------------|------------------------------|
| <b>Sample Name:</b>        | Vegetable Oil         | <b>Covance Sample:</b>   | 6048836                      |
| <b>Project ID</b>          | UCDAVIS-20170412-0001 | <b>Receipt Date</b>      | 11-Apr-2017                  |
| <b>PO Number</b>           | CVD                   | <b>Receipt Condition</b> | Cold on Wet Ice or Ice Packs |
| <b>Lot Number</b>          | Wesson Best Blend     | <b>Login Date</b>        | 12-Apr-2017                  |
| <b>Sample Serving Size</b> | 100 mL                | <b>Online Order</b>      | 11527-D9E5676                |
| <b>Description</b>         | open 02/27/17         |                          |                              |

**Analysis**
**Result**
**Fatty Acids Calculated as Triglycerides**

|                                               |                       |
|-----------------------------------------------|-----------------------|
| Saturated Fatty Acids (Acid Form)             | 10.2 g/Serving Size   |
| Total Cis Unsaturated Fatty Acids (Acid Form) | 71.7 g/Serving Size   |
| Monounsaturated Fatty Acids (Acid Form)       | 33.9 g/Serving Size   |
| Polyunsaturated Fatty Acids (Acid Form)       | 37.8 g/Serving Size   |
| Trans Fatty Acids (Acid Form)                 | 1.36 g/Serving Size   |
| Omega 3 Fatty Acids                           | 5.63 g/Serving Size   |
| Omega 6 Fatty Acids                           | 33.8 g/Serving Size   |
| Omega 9 Fatty Acids                           | 33.4 g/Serving Size   |
| Total Fatty Acids                             | 87.1 g/Serving Size   |
| 4:0 Butyric                                   | <0.064 g/Serving Size |
| 6:0 Caproic                                   | <0.064 g/Serving Size |
| 8:0 Caprylic                                  | <0.064 g/Serving Size |
| 10:0 Capric                                   | <0.064 g/Serving Size |
| 12:0 Lauric                                   | <0.064 g/Serving Size |
| 14:0 Myristic                                 | <0.064 g/Serving Size |
| 14:1 Myristoleic                              | <0.064 g/Serving Size |
| 15:0 Pentadecanoic                            | <0.064 g/Serving Size |
| 15:1 Pentadecenoic                            | <0.064 g/Serving Size |
| 16:0 Palmitic                                 | 7.10 g/Serving Size   |
| 16:1 Palmitoleic                              | 0.120 g/Serving Size  |
| 17:0 Heptadecanoic                            | 0.067 g/Serving Size  |
| 17:1 Heptadecenoic                            | <0.064 g/Serving Size |
| 18:0 Stearic                                  | 2.82 g/Serving Size   |
| 9c 18:1 Oleic                                 | 32.1 g/Serving Size   |
| 18:2 Linoleic                                 | 33.8 g/Serving Size   |
| 18:3 Gamma Linolenic                          | <0.064 g/Serving Size |
| 18:3 Linolenic                                | 5.63 g/Serving Size   |
| 18:4 Octadecatetraenoic                       | <0.064 g/Serving Size |
| 20:0 Arachidic                                | 0.380 g/Serving Size  |
| 20:1 Eicosenoic                               | 1.12 g/Serving Size   |
| 20:2 Eicosadienoic                            | <0.064 g/Serving Size |
| 20:3 Eicosatrienoic (n3)                      | <0.064 g/Serving Size |
| 20:3 Homogamma Linolenic (n6)                 | <0.064 g/Serving Size |
| 20:4 Arachidonic (n3)                         | <0.064 g/Serving Size |
| 20:4 Arachidonic (n6)                         | <0.064 g/Serving Size |
| 20:5 Eicosapentaenoic                         | <0.064 g/Serving Size |
| 21:5 Heneicosapentaenoic                      | <0.064 g/Serving Size |

## Certificate of Analysis

### University of California, Davis

1 Shields Ave, Meyer Hall Rm 2218  
Davis California 95616 United States

|                            |                       |                          |                              |
|----------------------------|-----------------------|--------------------------|------------------------------|
| <b>Sample Name:</b>        | Vegetable Oil         | <b>Covance Sample:</b>   | 6048836                      |
| <b>Project ID</b>          | UCDAVIS-20170412-0001 | <b>Receipt Date</b>      | 11-Apr-2017                  |
| <b>PO Number</b>           | CVD                   | <b>Receipt Condition</b> | Cold on Wet Ice or Ice Packs |
| <b>Lot Number</b>          | Wesson Best Blend     | <b>Login Date</b>        | 12-Apr-2017                  |
| <b>Sample Serving Size</b> | 100 mL                | <b>Online Order</b>      | 11527-D9E5676                |
| <b>Description</b>         | open 02/27/17         |                          |                              |

| Analysis                                       | Result                |
|------------------------------------------------|-----------------------|
| <b>Fatty Acids Calculated as Triglycerides</b> |                       |
| 22:0 Behenic                                   | 0.302 g/Serving Size  |
| 22:1 Erucic                                    | <0.064 g/Serving Size |
| 22:2 Docosadienoic                             | <0.064 g/Serving Size |
| 22:3 Docosatrienoic                            | <0.064 g/Serving Size |
| 22:4 Docosatetraenoic                          | <0.064 g/Serving Size |
| 22:5 Docosapentaenoic (n3)                     | <0.064 g/Serving Size |
| 22:5 Docosapentaenoic (n6)                     | <0.064 g/Serving Size |
| 22:6 Docosahexaenoic                           | <0.064 g/Serving Size |
| 24:0 Lignoceric                                | 0.113 g/Serving Size  |
| 24:1 Nervonic                                  | 0.120 g/Serving Size  |
| Total 18:1 trans                               | <0.064 g/Serving Size |
| Total 18:1 cis                                 | 34.1 g/Serving Size   |
| Total 18:2 trans                               | 0.586 g/Serving Size  |
| Total 18:3 trans                               | 0.832 g/Serving Size  |
| <b>Specific Gravity</b>                        |                       |
| Density                                        | 0.921 g/mL            |
| <b>P-Anisidine Value</b>                       |                       |
| P-Anisidine Value                              | 1.45                  |
| <b>Peroxide Value</b>                          |                       |
| Peroxide Value                                 | 0.70 Meq/kg of fat    |

| Method References                                                                                                                                                                                         | Testing Location                      |
|-----------------------------------------------------------------------------------------------------------------------------------------------------------------------------------------------------------|---------------------------------------|
| <b>Fatty Acids Calculated as Triglycerides (FALT_S)</b>                                                                                                                                                   | <b>Covance Laboratories - Madison</b> |
| Official Method No. 996.06, Official Methods of Analysis of the AOAC INTERNATIONAL (modified), 19th Ed., AOAC INTERNATIONAL: Gaithersburg, Maryland (2012).                                               |                                       |
| Official Methods and Recommended Practices of the AOCS, Official methods Ce 2b-11 (2011), Ce 1h-05 (2009), Ce 1j-07 (2013), Ce 2-66 (2009), The American Oil Chemists' Society, Champaign, IL (modified). |                                       |
| <b>P-Anisidine Value (ANID_S)</b>                                                                                                                                                                         | <b>Covance Laboratories - Madison</b> |
| Official Methods and Practices of the American Oil Chemists' Society 5th Edition, AOCS Official Method Cd 18-90, American Oil Chemists' Society, Champaign, IL (1997)                                     |                                       |
| United States Pharmacopeia, Thirty-second Revision, <401 Fats & Fixed Oils>, USP Convention, Inc., Rockville, MD (2010).                                                                                  |                                       |

## Certificate of Analysis

University of California, Davis

1 Shields Ave, Meyer Hall Rm 2218

Davis California 95616 United States

### Method References

### Testing Location

#### Peroxide Value (PVFF\_S)

Covance Laboratories - Madison

American Oil Chemists' Society, Cd 8-53 Peroxide Value Acetic Acid-Chloroform Method (modified), Official Methods and Recommended Practices of AOCS, Fifth Ed., American Oil Chemists' Society, Champaign, IL (2003).

United States Pharmacopeia, 34th Rev., <401> Fats & Fixed Oils, USP Convention, Inc., p. 153, Rockville, MD (2011).

Lipid extraction: Official Methods of Analysis of the AOAC International, 18th edition, Rev 4, Official Method 983.23. AOAC International, Gaithersburg, MD. 2005 (modified).

#### Specific Gravity (SPGP\_S)

Covance Laboratories - Madison

NIST Handbook 133 - Checking the Net Contents of Packaged Goods, 2015 Edition (Modified)

### Testing Location(s)

### Released on Behalf of Covance by

#### Covance Laboratories - Madison

Edward Ladwig - Director

Covance Laboratories Inc.  
3301 Kinsman Blvd  
Madison WI 53704  
800-675-8375

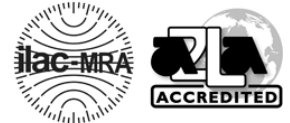

2918.01

These results apply only to the items tested. This certificate of analysis shall not be reproduced, except in its entirety, without the written approval of Covance.
